# Supplementary material
Source: PubMed Central journal article supplement (PMC8349776)

**Supplementary Table S1. Summary of structural statistics<sup>a</sup>, Related to Figures 2, 3, 4, 6 and Table 1.**

|                                                                     | BRD3 ET       | IN TP -<br>BRD3 ET        | IN CTD -BRD3<br>ET        | NSD3 <sup>(148-184)</sup> -<br>BRD3 ET |
|---------------------------------------------------------------------|---------------|---------------------------|---------------------------|----------------------------------------|
| <b>Conformationally-restricting restraints<sup>b</sup></b>          |               |                           |                           |                                        |
| NOE based distance restraints                                       |               |                           |                           |                                        |
| Total                                                               | 1277          | 1533                      | 1996                      | 1609                                   |
| Intra-residue ( $i = j$ )                                           | 305           | 418                       | 411                       | 366                                    |
| Sequential ( $ i-j  = 1$ )                                          | 446           | 461                       | 532                       | 568                                    |
| Medium range ( $1 <  i-j  < 5$ )                                    | 370           | 392                       | 218                       | 366                                    |
| Long range ( $ i-j  \geq 5$ )                                       | 156           | 262                       | 835                       | 309                                    |
| Dihedral angle restraints                                           | 122           | 166                       | 212                       | 138                                    |
| Hydrogen bond restraints                                            | 38            | 22                        | 56                        | 52                                     |
| Total no. of conformationally-restraining restraints                | 1437          | 1721                      | 2264                      | 1799                                   |
| No. of restraints per residue                                       | 16.3          | 16.0                      | 15.3                      | 14.3                                   |
| No. of long-range restraints per residue                            | 1.8           | 2.5                       | 5.9                       | 2.5                                    |
| <b>Residual restraint violation statistics<sup>b</sup></b>          |               |                           |                           |                                        |
| Average no. of distance violations per structure <sup>c</sup>       |               |                           |                           |                                        |
| 0.1–0.2 Å                                                           | 22.3          | 6.7                       | 1.2                       | 13.2                                   |
| 0.2–0.5 Å                                                           | 12.9          | 1.6 (0.45 Å) <sup>c</sup> | 0                         | 5.1                                    |
| > 0.5 Å                                                             | 0.45 (0.7Å)   | 0 (0.35 Å)                | 0 (0.14 Å)                | 0.1 (0.57 Å)                           |
| Average no. of dihedral angle violations per structure <sup>c</sup> |               |                           |                           |                                        |
| 1–10°                                                               | 9.9           | 8.25                      | 10.15                     | 4.8                                    |
| >10°                                                                | 0 (8.0°)      | 0 (7.0°)                  | 0.35 (11.9°)              | 0 (5.8°)                               |
| <b>Model quality statistics<sup>b</sup></b>                         |               |                           | <b>IN SH3 / ETBM - ET</b> |                                        |
| RMSD backbone atoms                                                 | 0.5 Å         | 0.6 Å                     | 0.5 Å / 1.1 Å             | 0.6 Å                                  |
| RMSD heavy atoms                                                    | 1.0 Å         | 1.1 Å                     | 0.8 Å / 1.6 Å             | 1.1 Å                                  |
| RMSD bond angles                                                    | 1.20°         | 1.10°                     | 1.20°                     | 1.20°                                  |
| RMSD bond lengths                                                   | 0.019 Å       | 0.018 Å                   | 0.019 Å                   | 0.018 Å                                |
| MolProbity Ramachandran statistics <sup>b,d</sup>                   |               |                           |                           |                                        |
| Most favored regions (%)                                            | 98.1%         | 97.8%                     | 93.1%                     | 95.4%                                  |
| Allowed regions (%)                                                 | 1.5%          | 2.2%                      | 5.1%                      | 4.5%                                   |
| Generously allowed regions (%)                                      | 0.4%          | 0.0%                      | 1.8%                      | 0.1%                                   |
| Global quality scores (Raw/Z-score) <sup>b</sup>                    |               |                           |                           |                                        |
| Verify3D                                                            | 0.16 / -4.82  | 0.18 / -4.49              | 0.18 / -4.49              | 0.39 / -1.12                           |
| ProsaII                                                             | 0.68 / 0.12   | 0.57 / -0.33              | 0.47 / -0.74              | 0.63 / -0.08                           |
| Procheck (phi-psi) <sup>d</sup>                                     | 0.03 / 0.43   | -0.03 / 0.20              | -0.43 / -1.38             | -0.24 / -0.63                          |
| Procheck (all) <sup>d</sup>                                         | -0.24 / -1.42 | -0.12 / -0.71             | -0.56 / -3.31             | -0.24 / -1.42                          |
| MolProbity clash score                                              | 9.4/-0.09     | 6.07 / 0.48               | 7.21 / 0.29               | 5.76 / 0.54                            |
| RPF scores <sup>e</sup>                                             |               |                           |                           |                                        |
| Recall/precision                                                    | 0.91 / 0.88   | 0.89 / 0.78               | 0.92 / 0.94               | 0.97 / 0.80                            |
| F-measure/DP-score                                                  | 0.89 / 0.78   | 0.84 / 0.71               | 0.93 / 0.76               | 0.89 / 0.89                            |

<sup>a</sup>Structural statistics computed for the ensemble of 20 deposited structures. <sup>b</sup>Calculated using PSVS 1.5 (Bhattacharya et al., 2007). Average distance violations were calculated using the sum over  $r^{-6}$ . <sup>c</sup>Largest violation is show in parenthesis.

<sup>d</sup>Based on ordered residue ranges [ $S(\phi) + S(\psi) > 1.8$ ]. <sup>e</sup>RPF-DP scores reflecting the goodness-of-fit of the final ensemble of structures (including disordered residues) to the NOESY data and resonance assignments (Huang et al., 2012).

**Supplementary Table S2. Key intermolecular interactions between peptides and BRD3 ET in complexes<sup>a</sup>, Related to Figure 7.**

| Intermolecular interactions                          | BRD3 ET- TP                                                                                                                                                                                                  | BRD3 ET- NSD3 <sub>148-184</sub>                                                                                                                                                                       |
|------------------------------------------------------|--------------------------------------------------------------------------------------------------------------------------------------------------------------------------------------------------------------|--------------------------------------------------------------------------------------------------------------------------------------------------------------------------------------------------------|
| Hydrogen bond pairs                                  | Gly589(O), Trp390(NE1);<br>Ile614(O), Leu403(N);<br>Ile614(N), Leu403(O);<br>Glu615(OE2), Ser395(O);<br>Ile616(O), Ile401(N);<br>Ile616(N), Ile401(O);<br>Phe618(N), Leu399(O);<br>Glu619(OE2), Asn397(ND2); | Asp612(O), Lys159(N);<br>Ile614(O), Ile157(N),<br>Ile614(N), Ile157(O);<br>Ile616(N), Leu155(O);<br>Ile616(O), Leu155(N);<br>Phe618(N), Ile153(O);<br>Glu619(N), Ile153(O);<br>Glu619(OE1), Ile153(N); |
| Salt bridges                                         | Asp612(OD1), Arg405(NH2);<br>Glu613(OE1), Arg402(NH1);<br>Glu615(OE2), Arg402(NH2);<br>Asp617(OD2), Lys400(NZ);                                                                                              | Glu613(OE2), Lys156(NZ);<br>Glu615(OE2), Lys154(NZ);<br>Asp617(OD2), Lys154(NZ);                                                                                                                       |
| Residues of ET forming Hydrophobic interactions      | Ile584, Leu592, Val595,<br>Val596, Ile599, Ile614, Ile616,<br>Phe618, Leu621                                                                                                                                 | Ile584, Leu592, Val595,<br>Val596, Ile599, Ile614, Ile616,<br>Phe618, Leu621                                                                                                                           |
| Residues of Peptide forming Hydrophobic interactions | Trp390, Val392, Ile401, Leu403                                                                                                                                                                               | Ile153, Leu155, Ile157, Phe168                                                                                                                                                                         |

<sup>a</sup>The H-bond and salt bridges were identified using the default settings in CHIMERA (Pettersen et. al 2004) and distance measurements using PyMOL with donor-acceptor distances  $\leq 3.2 \text{ \AA}$  and  $\leq 4.0 \text{ \AA}$  respectively. Hydrophobic interactions were identified using PyMOL (The PyMOL Molecular Graphics System, Version 2.0 Schrodinger, LLC.).

**Supplementary Table S3. Buried surface analysis for interfaces of BRD ET complexes<sup>a</sup>.  
Related to Figure 7.**

|                   | <b>TP :<br/>BRD3-ET</b> | <b>NSD3<sub>148-184</sub> :<br/>BRD3-ET</b> | <b>JMJD6 :<br/>BRD3-ET<br/>PDB ID: 6BNH</b> | <b>NSD3<sub>152-163</sub> :<br/>BRD4-ET-<br/>PDB ID: 2NCZ</b> |
|-------------------|-------------------------|---------------------------------------------|---------------------------------------------|---------------------------------------------------------------|
| Complex           | 7081                    | 9317                                        | 6677                                        | 6442                                                          |
| ET                | 6178                    | 6035                                        | 6377                                        | 5949                                                          |
| Peptide           | 2539                    | 4891                                        | 1900                                        | 1931                                                          |
| Buried<br>surface | 1635                    | 1609                                        | 1560                                        | 1439                                                          |

<sup>a</sup>Solvent accessibility determined in units of Å<sup>2</sup> using the program *GETAREA/PyMol* (Fraczkiewicz and Braun, 1998)

**Supplementary Table S4: List of Oligonucleotides, Related to STAR Methods.**

| <b>Construct</b>                                                                    | <b>Oligonucleotide</b>                                                                                                                                                                                                                                                                                                                                                                                                                                                                                                                                    |
|-------------------------------------------------------------------------------------|-----------------------------------------------------------------------------------------------------------------------------------------------------------------------------------------------------------------------------------------------------------------------------------------------------------------------------------------------------------------------------------------------------------------------------------------------------------------------------------------------------------------------------------------------------------|
| MLV IN <sub>386-407</sub> (IN CTD TP) duplex DNA for cloning into pGV358 vector     | 5' TATGAGCCGCCTGACCTGGCGCGTGCAGCGCAGCCAGAACCCGCTGAAATTCGCCCTGACCCGCGAAGCGTGCATCACGGGAGATGCA 3'                                                                                                                                                                                                                                                                                                                                                                                                                                                            |
|                                                                                     | 5' CTAGTGCATCTCCCGTGATGCACGCTTCGCGGGTCAGGCGAATTTTCAGCGGGTCTGGCTGCGCTGCACGCGCCAGGTCAGGCGGCTCA 3'                                                                                                                                                                                                                                                                                                                                                                                                                                                           |
| Gene block synthesized for NSD3 <sub>100-263</sub>                                  | 5' GGAATTCATATGTTTCGGTGCTGTTTCGTAACCTCTCTCCGACCGACTACTACCACCTCTGAAATCCCGAACACCCGTCGCGACGAAATCCTGGAAAAACCGTCTCCGCCGACCCGCCGCCGCGCCGCTCTGTTCCGCAGACCGTTATCCCGAAAAAACCAGTTCTCTCCGAAATCAAACCTGAAAATCACCAAAACCATCCAGAACGGTCGTGAACGTTTCGAATCTTCTCTGTGCGGTGACCTGCTGAACGAAGTTCAGGCTTCTGAACACACCAAATCTAAACACGAATCTCGTAAAGAAAAACGTAAAAAATCTAACAAACACGACTCTTCTCGTTCTGAAGAACGTAATCTCACAAAATCCCGAACTGGAACCGGAAGAACAGAACCGTCCGAACGAACGTGTTGACACCGTTTCTGAAAAACCGCGTGAAGAACCGTTCTGAAAGAAGAAGCTCCGGTTCAGCCGATCCTGTCTTCTGTTCGACCACCGAAGTTTCTTATTGCATTACCGGCGATGCACTAGTCC 3' |
| NSD3 <sub>100-263</sub> amplification for cloning into pSUMO vector                 | 5' CCGGAATTCCTTCGGTGCTGTTTCGTAACCTCTCTCCG 3'                                                                                                                                                                                                                                                                                                                                                                                                                                                                                                              |
|                                                                                     | 5' CCATGAAGCTTTTAAGAAACTTCGGTGGTCGGAACAGAAGAC 3'                                                                                                                                                                                                                                                                                                                                                                                                                                                                                                          |
| NSD3 <sub>142-166</sub> duplex DNA for cloning into pSUMO vector                    | 5' AATTCACCGTTATCCCGAAAAAACCAGTTCTCCGAAATCAAACCTGAAAATCACCAAACCATCCAGAACGGTCGTGAATAA 3'                                                                                                                                                                                                                                                                                                                                                                                                                                                                   |
|                                                                                     | 5' AGCTTTATTACGACCGTTCTGGATGGTTTTGGTGATTTTTCAGTTGATTTCCGGAGAACCAGTTTTCGGGATAACGGTG 3'                                                                                                                                                                                                                                                                                                                                                                                                                                                                     |
| NSD3 <sub>148-184</sub> amplification for cloning into pSUMO vector                 | 5' CCGGAATTCACCGTTCTCCGAAATCAAACCTG 3'                                                                                                                                                                                                                                                                                                                                                                                                                                                                                                                    |
|                                                                                     | 5' CCATGAAGCTTTTATTTCAGAAGCCTGAACTTCGTTTCAGCAG 3'                                                                                                                                                                                                                                                                                                                                                                                                                                                                                                         |
| Gene block synthesized for LANA <sub>1108-1141</sub> for cloning into pGV358 vector | 5' GGGAAATTCATATGAATAAAGATACCTCCAAAAAAGTGCAGATGGCGCGTCTGGCGTGGGAAGCGTCCCATCCGCTGGCGGGCAATCTGCAGTCCCTCCATTGTGAAATTTAAAAAATGCATTACCGGCGATGCACTAGTCC 3'                                                                                                                                                                                                                                                                                                                                                                                                      |
| JMJD6 <sub>1-336</sub> amplification for cloning into pSUMO vector                  | 5' CCGGAATTCATGAACCACAAGAGCAAGAAGCGC 3'                                                                                                                                                                                                                                                                                                                                                                                                                                                                                                                   |
|                                                                                     | 5' CCATGAAGCTTTTCATGTGGACTCCTGAAGGTCAACC 3'                                                                                                                                                                                                                                                                                                                                                                                                                                                                                                               |

**Supplementary Table S5: NMR samples and data used for resonance assignments, structure determination, and nuclear relaxation measurements, Related to STAR Methods.**

| Sample                                                                                           | Volume (μL) | pH  | NMR Tube Diameter (mm) / Probe | Field Strength | NMR Experiments                                                                                                                                                                                                                                                                                                     |
|--------------------------------------------------------------------------------------------------|-------------|-----|--------------------------------|----------------|---------------------------------------------------------------------------------------------------------------------------------------------------------------------------------------------------------------------------------------------------------------------------------------------------------------------|
| <sup>13</sup> C <sup>15</sup> N BRD3 ET                                                          | 275         | 7.0 | 4 / 5-mm CRP TXI               | 800 MHz        | 2D <sup>15</sup> N- <sup>1</sup> H HSQC, 2D HNOE, 2D <sup>13</sup> C- <sup>1</sup> H HSQC, 3D HNC0, 3D HNCA, 3D HNCACB, 3D CBCAcoNH, 3D HBHAcoNH, 3D hCCH-TOCSY, 3D <sup>13</sup> C-aromatic NOESY, 3D <sup>13</sup> C, <sup>15</sup> N simNOESY                                                                    |
| <sup>13</sup> C <sup>15</sup> N MLV IN TP                                                        | 350         | 7.0 | 5 / 5-mm CRP TXI               | 800 MHz        | 2D <sup>15</sup> N- <sup>1</sup> H HSQC, 2D HNOE, 2D <sup>13</sup> C- <sup>1</sup> H HSQC, 2D <sup>15</sup> N- <sup>1</sup> H TROSY, 3D HNCACB, 3D CBCAcoNH, 3D HBHAcoNH, 3D HNCA, 3D hCCH-TOCSY, 3D <sup>13</sup> C, <sup>15</sup> N simNOESY                                                                      |
| <sup>13</sup> C <sup>15</sup> N MLV IN TP + unlabeled BRD3 ET complex                            | 275         | 7.0 | 4 / 5-mm CRP TXI               | 800 MHz        | 2D <sup>15</sup> N- <sup>1</sup> H HSQC, 2D HNOE, 2D <sup>13</sup> C- <sup>1</sup> H HSQC, 3D HNC0, 3D HNCA, 3D HNCACB, 3D CBCAcoNH, 3D HBHAcoNH, 3D hCCH-TOCSY, 3D <sup>13</sup> C X-filtered NOESY, 3D <sup>13</sup> C, <sup>15</sup> N simNOESY                                                                  |
| <sup>13</sup> C <sup>15</sup> N BRD3 ET + unlabeled MLV IN TP complex                            | 275         | 7.0 | 4 / 5-mm CRP TXI               | 800 MHz        | 2D <sup>15</sup> N- <sup>1</sup> H HSQC, 2D HNOE, 2D <sup>13</sup> C- <sup>1</sup> H HSQC, 3D HNC0, 3D HNCA, 3D HNCACB, 3D CBCAcoNH, 3D HBHAcoNH, 3D hCCH-TOCSY, 3D <sup>13</sup> C X-filtered NOESY, 3D <sup>13</sup> C, <sup>15</sup> N simNOESY                                                                  |
| <sup>13</sup> C <sup>15</sup> N BRD3 ET- <sup>13</sup> C <sup>15</sup> N MLV IN TP complex       | 275         | 7.0 | 4 / 5-mm CRP TXI               | 800 MHz        | 2D <sup>15</sup> N- <sup>1</sup> H HSQC, 2D <sup>13</sup> C- <sup>1</sup> H HSQC, 3D HNC0, 3D HNCA, 3D HNCACB, 3D CBCAcoNH, 3D HBHAcoNH, 3D hCCH-TOCSY, 3D <sup>13</sup> C-aromatic NOESY, 3D <sup>13</sup> C, <sup>15</sup> N simNOESY                                                                             |
| <sup>13</sup> C <sup>15</sup> N BRD3 ET-MLV IN CTD complex                                       | 275         | 7.0 | 3 / 5-mm CRP TXI               | 800 MHz        | 2D <sup>15</sup> N- <sup>1</sup> H HSQC, 2D <sup>15</sup> N- <sup>1</sup> H TROSY, 2D <sup>13</sup> C- <sup>1</sup> H HSQC, 3D HNC0, 3D HNCA, 3D HNcoCA, 3D HNCACB, 3D CBCAcoNH, 3D HBHAcoNH, 3D HNHA, 3D HCCH-COSY, 3D hCCH-TOCSY, 3D <sup>13</sup> C-aromatic NOESY, 3D <sup>13</sup> C, <sup>15</sup> N simNOESY |
| <sup>15</sup> N BRD3 ET-MLV IN CTD complex                                                       | 275         | 7.2 | 3 / 5-mm TCI                   | 600 MHz        | 2D T1_relax, 2D T2_relax, 2D HNOE                                                                                                                                                                                                                                                                                   |
| <sup>13</sup> C <sup>15</sup> N NSD3 <sub>148-184</sub>                                          | 40          | 7.0 | 1.7 / 5-mm TCI                 | 600 MHz        | 2D <sup>15</sup> N- <sup>1</sup> H HSQC, 2D <sup>13</sup> C- <sup>1</sup> H HSQC, 2D HNOE, 3D HNC0, 3D HNCA, 3D HNCACB, 3D CBCAcoNH, 3D HBHAcoNH, 3D hCCH-TOCSY, 3D <sup>13</sup> C, <sup>15</sup> N simNOESY                                                                                                       |
| <sup>13</sup> C <sup>15</sup> N BRD3 ET-unlabeled NSD3 <sub>148-184</sub>                        | 40          | 7.0 | 1.7 / 5-mm CRP TXI             | 800 MHz        | 2D <sup>15</sup> N- <sup>1</sup> H HSQC, 2D <sup>13</sup> C- <sup>1</sup> H HSQC, 2D HNOE, 3D HNC0, 3D HNCACB, 3D CBCAcoNH, 3D HBHAcoNH, 3D hCCH-TOCSY, 3D <sup>13</sup> C, <sup>15</sup> N simNOESY, 3D <sup>13</sup> C-aromatic NOESY, 3D <sup>13</sup> C X-filtered NOESY                                        |
| <sup>13</sup> C <sup>15</sup> N BRD3 ET- <sup>13</sup> C <sup>15</sup> N NSD3 <sub>148-184</sub> | 275         | 7.0 | 3 / 5-mm TCI                   | 600 MHz        | 2D <sup>15</sup> N- <sup>1</sup> H HSQC, 2D <sup>13</sup> C- <sup>1</sup> H HSQC, 2D HNOE, 3D HNC0, 3D HNCA, 3D HNCACB, 3D CBCAcoNH, 3D HBHAcoNH, 3D hCCH-TOCSY, 3D <sup>13</sup> C, <sup>15</sup> N simNOESY, 3D <sup>13</sup> C-aromatic NOESY                                                                    |

Solution NMR structures were determined using uniformly labeled samples of <sup>13</sup>C, <sup>15</sup>N-BRD3 ET at ~ 0.5 mM protein concentration, in buffers containing 20 mM sodium phosphate, 100 mM NaCl, 2 mM 2-mercaptoethanol at pH 7.0 (or for one sample pH 7.2). The complexes of BRD3 ET were prepared by adding the TP, MLV IN-CTD or NSD3148-184 to ET. 1D <sup>15</sup>N T<sub>1</sub> and T<sub>2</sub> relaxation data acquired and analyzed to confirm the complex formation under the buffer conditions. These free induction decay (FID) data have been deposited in the BioMagResDatabase.

**Supplementary Fig. S1.  $^{15}\text{N}$ - $^1\text{H}$ ]-HSQC spectrum, Related to Figures 2, 3 and 6. (A)  $^{15}\text{N}$ - $^1\text{H}$ ]-HSQC of BRD3 ET domain. 2D  $^{15}\text{N}$ ,  $^1\text{H}$ ]-HSQC spectrum of  $^{13}\text{C}$ ,  $^{15}\text{N}$  BRD3 ET acquired at 25°C using 45  $\mu\text{L}$  of 0.5 mM sample at pH 7.0 and 600 Hz Bruker Avance NMR spectrometer equipped with a 1.7-mm micro cryoprobe. Backbone amide  $^{15}\text{N}$ ,  $^1\text{H}$  resonance assignments are labeled in black. (B and C). Perturbations for the  $^{15}\text{N}$ ,  $^{13}\text{C}$ -enriched TP without and with ET domain. (B)  $^{15}\text{N}$ - $^1\text{H}$ ]-HSQC spectrum of unbound  $^{15}\text{N}$  labeled MLV IN CTD TP. (C)  $^{15}\text{N}$ - $^1\text{H}$ ]-HSQC spectrum of  $^{15}\text{N}$  labeled MLV IN CTD TP bound to unlabeled BRD3 ET domain. Assignments of some resonances of TP are indicated. (D and E) Perturbations for the  $^{15}\text{N}$ ,  $^{13}\text{C}$ -enriched NSD3<sub>148-184</sub> without and with ET domain. (D) 2D  $^{15}\text{N}$ - $^1\text{H}$  HSQC spectrum of  $^{13}\text{C}$ ,  $^{15}\text{N}$ -NSD3<sub>148-184</sub>. (E)  $^{13}\text{C}$ ,  $^{15}\text{N}$ -NSD3<sub>148-184</sub>- $^{13}\text{C}$ ,  $^{15}\text{N}$ -BRD3 ET complex. Assignments of some resonances of NSD3<sub>148-184</sub> are indicated.**

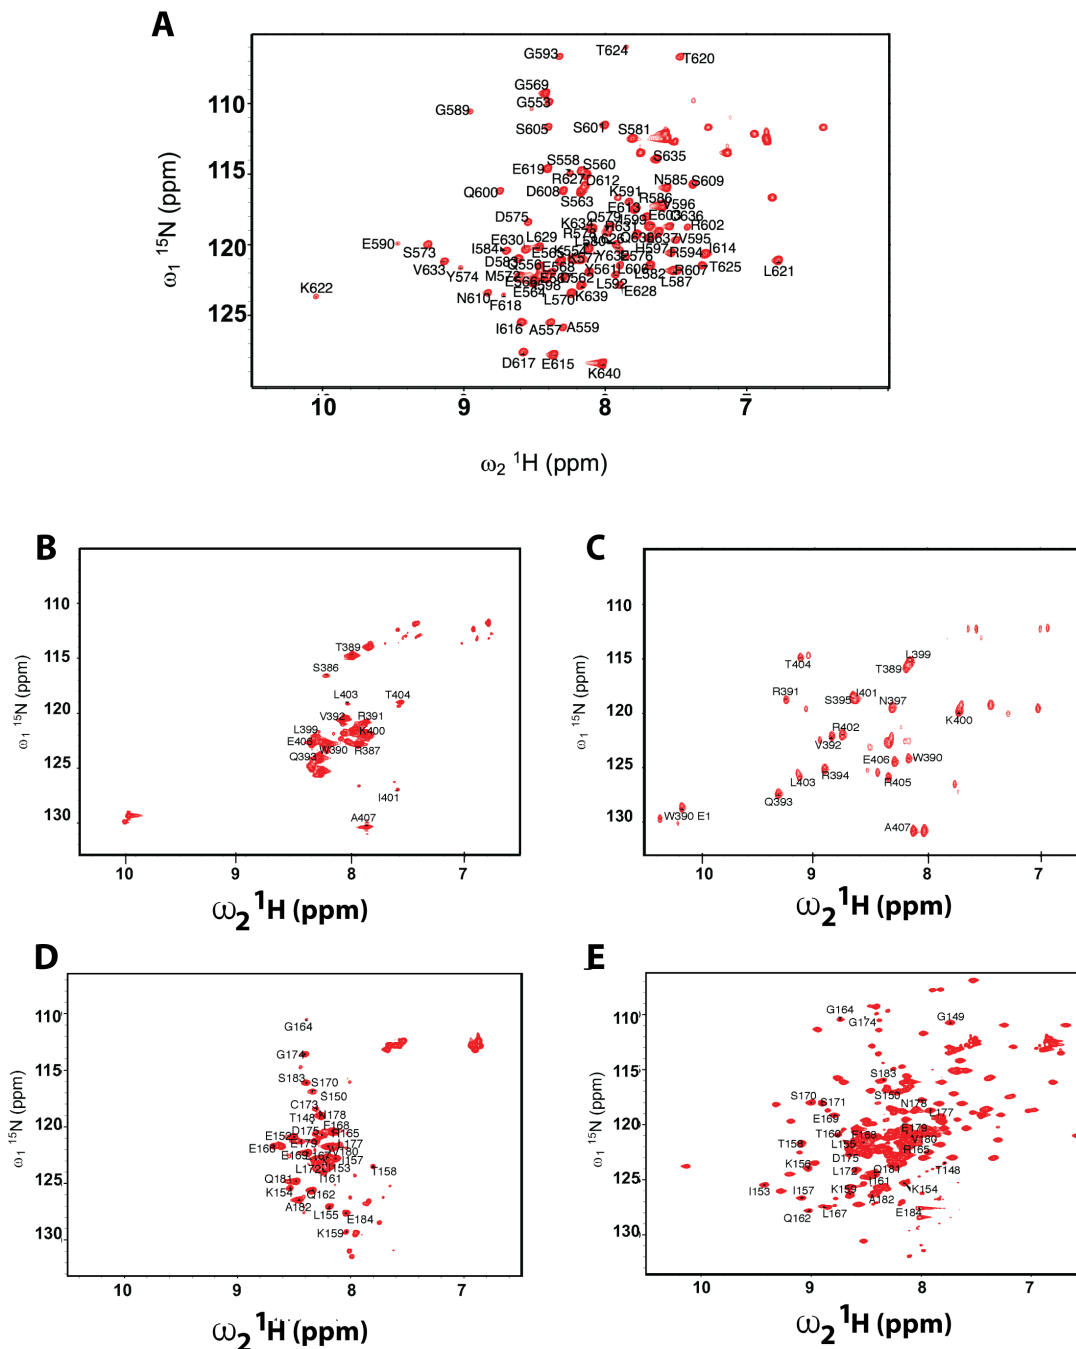

**Supplementary Fig. S2. Peptide purification schematic, Related to Figures 3 and 6.** Isotopically enriched peptides for NMR analyses were initially expressed as fusion proteins in *E.coli*, to facilitate cost effective rapid structure determination. The schematic of the IN CTD TP<sub>386-407</sub> chitin binding domain (CBD) fusion protein (left) and the NSD3<sub>148-184</sub>-SUMO fusion protein (right) are illustrated at the top. Position of the His<sub>6</sub> tag (H6) is indicated. The sequences of the peptides are indicated below each construct; amino-acid residues indicated in red are not encoded by the peptides of interest. For MLV CTD IN TP<sub>386-407</sub>, the C-terminal fusion of an intein-based self-cleavage system to express the peptide as a fusion protein encoded a non-native methionine at the N-terminus to initiate translation (right). The terminal Pro-408 was omitted, since prolines are incompatible with the intein self-cleavage system. Excluding the terminal proline did not affect the stability and binding efficiency of the TP construct. Purification of the peptides follow parallel protocols. On-column self-cleavage of the intein-CBD-6xHis under highly reducing conditions (Mitchell and Lorsch, 2015) following by affinity purification resulted in a greater than 90% pure, tagless peptide as assessed by mass spectrometry. Exemplary mass spectrometry of the TP<sub>386-407</sub> is shown on the left. The predicted molecular mass of the labeled peptide containing the N-terminal Met is 2830. Species smaller migrating at 2720 could result from loss of the terminal Met. Products larger at 2975 Da could result from incomplete removal of the DTT adduct after cleavage of the CBD. Using this purification strategy, we obtained highly-purified isotopically-enriched IN CTD TP with a yield of ~1.5 mgs per 1.5 liter culture. The schematic of the NSD3<sub>148-184</sub>-SUMO fusion protein is shown on the right. Parallel purification involved Nickel NTA affinity column purification, S75 size exclusion chromatography, enzymatic cleavage by the SUMO-protease, and concentration. Exemplary Coomassie staining of the purified NSD3 peptide is shown on the bottom right. Molecular weight standards are as indicated.

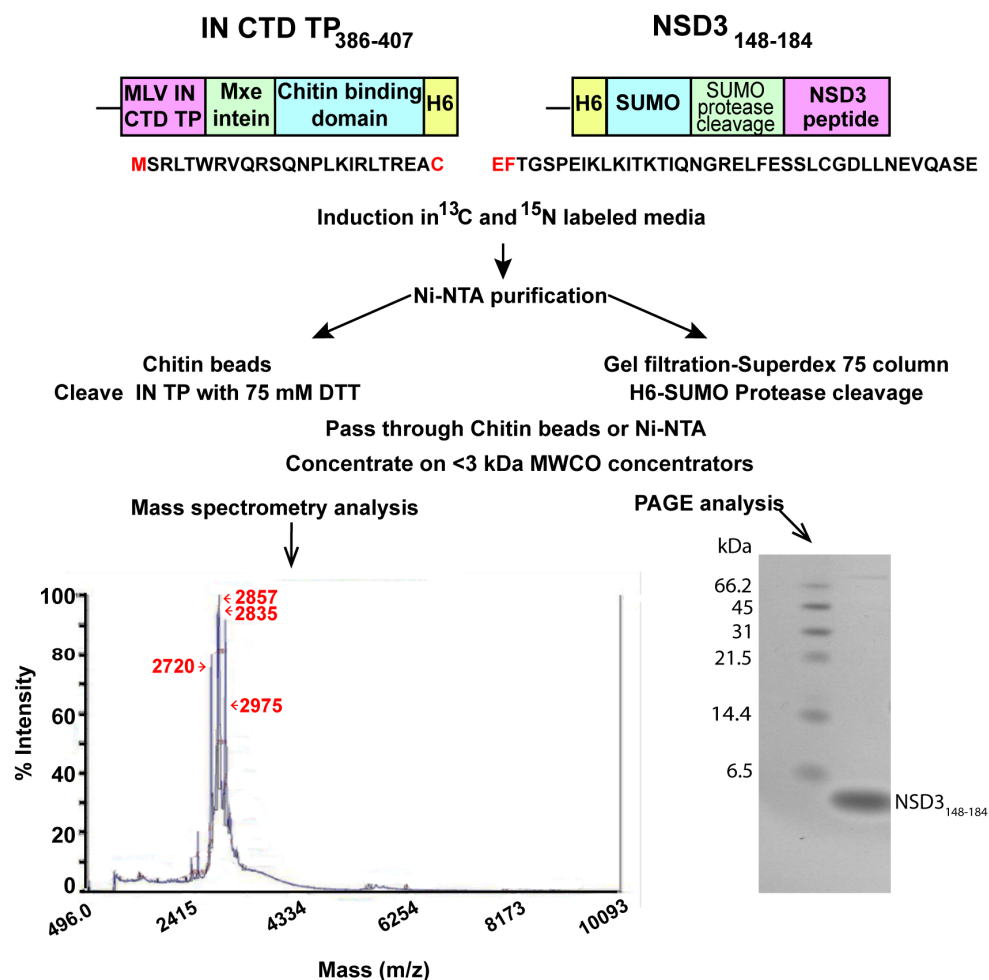

**Supplementary Fig. S3. Alignment of gammaretroviral IN linker regions (top) and NSD3 (bottom) proteins, Related to Figures 4, 5 and 7.** Alignments were performed using Clustal Omega (1.2.4) (Madeira et al., 2019, Sievers et al., 2011, Sievers and Higgins, 2018). Gammaretroviruses analyzed include: P10273- Feline leukemia virus, Q83379- Rat Leukemia virus, MH450110.1- Xenotropic murine leukemia virus (MLV) isolate AKR6, O39735- Friend murine leukemia virus, O41250- Rauscher murine leukemia virus, P08361- Cas-Br-E MLV, ABU54793.1- Amphotropic MLV 4070A, P03355- Moloney murine leukemia virus, P10272- Baboon endogenous virus, Q8J4V8- PERV-A, P21414- GaLV, and Q9TTC1- KoRV. M-MLV  $\Delta$ 5 and  $\Delta$  20 were isolated as described (Loyola et al., 2019). NSD3 protein sequences analyzed include: F1QV68- NSD3 (zebrafish), A0A1L8H2H2- NSD3 (xenopus), E1BNH7- NSD3 (bovine), F6WYL3- NSD3 (horse), Q9BZ95-NSD3 (human), H2R3Q8- NSD3 (chimpanzee), A0A286ZK72- NSD3 (pig), E2QUJ0-NSD3 (dog), M3WJ59-NSD3 (cat), Q6P2L6- NSD3 (mouse), and D3ZK47- NSD3 (rat). Consensus sequences notations are: (\*) fully conserved residue, (:) conservation between groups of strongly similar properties, and (.) conservation between groups of weakly similar properties (Gonnet et al., 1992). IN-TP and NSD3 peptide used in these studies are indicated in bold. Pro are highlighted in yellow. Conserved Trp for MLV-IN and Phe for NSD3 that form the cap to the hydrophobic network are highlighted in cyan. Position and conservation of the two beta-strands (B) of MLV IN and NSD3 interacting with the ET domain are indicated in red.

| <b>Gammaretrovirus</b>    |                                                                                                                                                                                                                                        |                           |      |     |
|---------------------------|----------------------------------------------------------------------------------------------------------------------------------------------------------------------------------------------------------------------------------------|---------------------------|------|-----|
| FeLVa (Feline)            | KAAG <b>P</b> TTNQDLSDS <b>P</b> SSDD <b>P</b> SRW <b>K</b> VQRTQ <b>N</b> PLKIRLSRGT-                                                                                                                                                 | BBB                       | BBBB | 412 |
| RaLV (Rat)                | KAAR <b>P</b> EETADHN-----IA <b>P</b> Q <b>T</b> WKAQRTQ <b>N</b> PLKLRFSRCCS                                                                                                                                                          |                           |      | 414 |
| XMLV (Xenotropic)         | KAAT <b>P</b> -----PAGAA <b>K</b> VQ <b>R</b> SQ <b>N</b> PLKIRLTRG <b>A</b> P                                                                                                                                                         |                           |      | 405 |
| MLV (Friend)              | KAADTKIE-- <b>P</b> -----P <b>S</b> EST <b>W</b> RVQ <b>R</b> SQ <b>N</b> PLKIRLTRG <b>T</b> S                                                                                                                                         |                           |      | 408 |
| MLV (Rauscher)            | KAADTRIE-- <b>P</b> -----P <b>S</b> EST <b>W</b> RVQ <b>R</b> SQ <b>N</b> PLKIRLTRG <b>T</b> S                                                                                                                                         |                           |      | 408 |
| MLV (CasBrE)              | KAAT <b>P</b> -----ARTAW <b>K</b> VQ <b>R</b> SQ <b>N</b> PLKIRLSRE <b>P</b> S                                                                                                                                                         |                           |      | 405 |
| MLV (Ampho/4070A)         | KAADTESG-- <b>P</b> S-----S-G <b>R</b> T <b>W</b> RVQ <b>R</b> SQ <b>N</b> PLKIRLTRG <b>S</b> P                                                                                                                                        |                           |      | 408 |
| MLV (Moloney)             | KAAD <b>P</b> GGG-- <b>P</b> S----- <b>S</b> RL <b>T</b> W <b>R</b> VQ <b>R</b> SQ <b>N</b> PL <b>K</b> IR <b>L</b> TRE <b>A</b> P                                                                                                     |                           |      | 408 |
| MLV $\Delta$ 5 (Moloney)  | KAAD <b>P</b> GGG--LC-----GR <b>K</b> L <b>T</b> W <b>R</b> VQ <b>R</b> SQ <b>N</b> PL <b>K</b> IR <b>L</b> TRE <b>A</b> P                                                                                                             |                           |      | 409 |
| MLV $\Delta$ 20 (Moloney) | KAAD <b>P</b> G-----R <b>K</b> L <b>T</b> W <b>R</b> VQ <b>R</b> SQ <b>N</b> PL <b>K</b> IR <b>L</b> TRE <b>A</b> P                                                                                                                    |                           |      | 404 |
| BaEV (Baboon)             | KAAP <b>G</b> TP <b>P</b> G <b>P</b> -----T <b>S</b> SG <b>T</b> W <b>R</b> L <b>R</b> RS <b>E</b> D <b>P</b> L <b>K</b> IR <b>L</b> S <b>R</b> T--                                                                                    |                           |      | 392 |
| PERVA (Porcine)           | K <b>P</b> AP <b>P</b> -----P <b>D</b> SG <b>W</b> K <b>A</b> E <b>K</b> T <b>E</b> N <b>P</b> L <b>K</b> L <b>R</b> L <b>H</b> R <b>V</b> V <b>P</b>                                                                                  |                           |      | 400 |
| GaLV (Gibbon Ape)         | K <b>P</b> AP <b>P</b> S-----A <b>P</b> DES <b>W</b> E <b>L</b> E <b>K</b> T <b>D</b> H <b>P</b> L <b>K</b> L <b>R</b> I <b>R</b> R <b>R</b> R <b>D</b>                                                                                |                           |      | 373 |
| KoRVA (Koala)             | K <b>P</b> AP <b>P</b> G-----A <b>P</b> DES <b>W</b> E <b>L</b> E <b>K</b> T <b>D</b> H <b>P</b> L <b>K</b> L <b>R</b> V <b>R</b> R <b>R</b> R <b>N</b>                                                                                |                           |      | 373 |
| Consensus                 | * *                                                                                                                                                                                                                                    | * . . : : . * * * * : . * |      |     |
| <b>NSD3</b>               |                                                                                                                                                                                                                                        |                           |      |     |
| NSD3zebrafish             | VL <b>P</b> PP <b>P</b> LL <b>L</b> L <b>P</b> SS <b>P</b> LL <b>S</b> PQ <b>E</b> ST <b>I</b> S <b>N</b> P <b>I</b> G <b>O</b> P <b>V</b> NT <b>I</b> IT <b>T</b> P                                                                   |                           |      | 221 |
| NSD3xenopus               | <b>P</b> E <b>P</b> T <b>S</b> <b>P</b> PN <b>L</b> L <b>Q</b> A----- <b>P</b> PS <b>S</b> T-T <b>P</b> EQ                                                                                                                             |                           |      | 148 |
| NSD3bovine                | <b>P</b> Q <b>P</b> PP <b>P</b> ----- <b>P</b> PS <b>V</b> PQ <b>T</b> V <b>I</b> P                                                                                                                                                    |                           |      | 146 |
| NSD3Horse                 | <b>P</b> Q <b>P</b> PP----- <b>P</b> PS <b>V</b> PQ <b>T</b> V <b>I</b> P                                                                                                                                                              |                           |      | 145 |
| <b>NDS3human</b>          | <b>P</b> Q <b>P</b> PP----- <b>P</b> PS <b>V</b> PQ <b>T</b> V <b>I</b> P                                                                                                                                                              |                           |      | 145 |
| NSD3chimpanzee            | <b>P</b> Q <b>P</b> PP----- <b>P</b> PS <b>V</b> PQ <b>T</b> V <b>I</b> P                                                                                                                                                              |                           |      | 145 |
| NSD3pig                   | <b>P</b> Q <b>P</b> PP----- <b>P</b> PS <b>V</b> PQ <b>T</b> V <b>I</b> P                                                                                                                                                              |                           |      | 145 |
| NSD3dog                   | <b>P</b> Q <b>L</b> PP----- <b>P</b> PS <b>V</b> PQ <b>T</b> V <b>I</b> P                                                                                                                                                              |                           |      | 145 |
| NSD3cat                   | <b>P</b> Q <b>P</b> PP----- <b>P</b> PS <b>V</b> PQ <b>T</b> V <b>I</b> P                                                                                                                                                              |                           |      | 145 |
| NSD3mouse                 | <b>P</b> Q <b>P</b> PP----- <b>P</b> PS <b>V</b> PQ <b>T</b> V <b>I</b> P                                                                                                                                                              |                           |      | 145 |
| NSD3rat                   | <b>P</b> Q <b>P</b> PP <b>P</b> LL <b>P</b> PP----- <b>P</b> PP <b>V</b> PQ <b>T</b> V <b>I</b> P                                                                                                                                      |                           |      | 146 |
| Consensus                 |                                                                                                                                                                                                                                        |                           | * *  |     |
| NSD3zebrafish             | K <b>K</b> T <b>S</b> <b>P</b> E <b>I</b> K <b>L</b> K <b>I</b> K <b>T</b> Y <b>Q</b> NG <b>R</b> E <b>L</b> F <b>E</b> S <b>S</b> L <b>C</b> G <b>D</b> L <b>L</b> Q <b>E</b> F <b>Q</b> A <b>G</b> E <b>D</b> S <b>R</b>             | BBB                       | BBB  | 263 |
| NSD3xenopus               | K <b>K</b> T <b>G</b> S <b>P</b> E <b>I</b> K <b>L</b> R <b>I</b> T <b>K</b> T <b>I</b> Q <b>N</b> G <b>R</b> E <b>M</b> F <b>E</b> S <b>S</b> L <b>C</b> G <b>D</b> L <b>L</b> H <b>E</b> F <b>Q</b> A <b>S</b> E <b>M</b> T <b>R</b> |                           |      | 190 |
| NSD3bovine                | K <b>K</b> T <b>G</b> S <b>P</b> E <b>I</b> K <b>L</b> K <b>I</b> T <b>K</b> T <b>I</b> Q <b>N</b> G <b>R</b> E <b>L</b> F <b>E</b> S <b>S</b> L <b>C</b> G <b>D</b> L <b>L</b> N <b>E</b> V <b>Q</b> A <b>S</b> E <b>H</b> T <b>K</b> |                           |      | 188 |
| NSD3horse                 | K <b>K</b> T <b>G</b> S <b>P</b> E <b>I</b> K <b>L</b> K <b>I</b> T <b>K</b> T <b>I</b> Q <b>N</b> G <b>R</b> E <b>L</b> F <b>E</b> S <b>S</b> L <b>C</b> G <b>D</b> L <b>L</b> N <b>E</b> V <b>Q</b> A <b>S</b> E <b>H</b> T <b>K</b> |                           |      | 187 |
| <b>NDS3human</b>          | K <b>K</b> T <b>G</b> S <b>P</b> E <b>I</b> K <b>L</b> K <b>I</b> T <b>K</b> T <b>I</b> Q <b>N</b> G <b>R</b> E <b>L</b> F <b>E</b> S <b>S</b> L <b>C</b> G <b>D</b> L <b>L</b> N <b>E</b> V <b>Q</b> A <b>S</b> E <b>H</b> T <b>K</b> |                           |      | 187 |
| NSD3chimpanzee            | K <b>K</b> T <b>G</b> S <b>P</b> E <b>I</b> K <b>L</b> K <b>I</b> T <b>K</b> T <b>I</b> Q <b>N</b> G <b>R</b> E <b>L</b> F <b>E</b> S <b>S</b> L <b>C</b> G <b>D</b> L <b>L</b> N <b>E</b> V <b>Q</b> A <b>S</b> E <b>H</b> T <b>K</b> |                           |      | 187 |
| NSD3pig                   | K <b>K</b> T <b>G</b> S <b>P</b> E <b>I</b> K <b>L</b> K <b>I</b> T <b>K</b> T <b>I</b> Q <b>N</b> G <b>R</b> E <b>L</b> F <b>E</b> S <b>S</b> L <b>C</b> G <b>D</b> L <b>L</b> N <b>E</b> V <b>Q</b> A <b>S</b> E <b>H</b> T <b>K</b> |                           |      | 187 |
| NSD3dog                   | K <b>K</b> T <b>G</b> S <b>P</b> E <b>I</b> K <b>L</b> K <b>I</b> T <b>K</b> T <b>I</b> Q <b>N</b> G <b>R</b> E <b>L</b> F <b>E</b> S <b>S</b> L <b>C</b> G <b>D</b> L <b>L</b> N <b>E</b> V <b>Q</b> A <b>S</b> E <b>H</b> T <b>K</b> |                           |      | 187 |
| NSD3cat                   | K <b>K</b> T <b>G</b> S <b>P</b> E <b>I</b> K <b>L</b> K <b>I</b> T <b>K</b> T <b>I</b> Q <b>N</b> G <b>R</b> E <b>L</b> F <b>E</b> S <b>S</b> L <b>C</b> G <b>D</b> L <b>L</b> N <b>E</b> V <b>Q</b> A <b>S</b> E <b>H</b> T <b>K</b> |                           |      | 187 |
| NSD3mouse                 | K <b>K</b> T <b>G</b> S <b>P</b> E <b>I</b> K <b>L</b> K <b>I</b> T <b>K</b> T <b>I</b> Q <b>N</b> G <b>R</b> E <b>L</b> F <b>E</b> S <b>S</b> L <b>C</b> G <b>D</b> L <b>L</b> N <b>E</b> V <b>Q</b> A <b>S</b> E <b>H</b> T <b>K</b> |                           |      | 187 |
| NSD3rat                   | K <b>K</b> T <b>G</b> S <b>P</b> E <b>I</b> K <b>L</b> K <b>I</b> T <b>K</b> T <b>I</b> Q <b>N</b> G <b>R</b> E <b>L</b> F <b>E</b> S <b>S</b> L <b>C</b> G <b>D</b> L <b>L</b> N <b>E</b> V <b>Q</b> A <b>S</b> E <b>H</b> L <b>K</b> |                           |      | 188 |
| Consensus                 | ***.*****:* ** *****:*****:*.*** ** :                                                                                                                                                                                                  |                           |      |     |



**Supplementary Fig. S4. Comparison of chemical shift perturbations of BRD3 ET induced by IN TP and NSD3, Related to Figures 3 and 6.** Panels A and B: HSQC of the BRD3 ET (blue) in the presence of unlabeled IN TP (panel A, red) and NSD3 (panel B, red). Chemical shift perturbations of BRD3 ET domain relative to the bound (C, D) TP and (E, F) NSD3<sub>148-184</sub> calculated using  $\Delta\delta(N,H) = ((\delta N/6)^2 + (\delta H)^2)^{0.5}$  and plotted as a function of BRD3 ET sequence. Panels D and F show an expansion of the data in Panels C and E, demonstrating that most residues have  $\Delta\delta(N,H)$  greater than 0.05 ppm (horizontal red lines), a typical cutoff value for unperturbed chemical shift changes on complex formation (Ma et al., 2016). Amino-acid residue positions marked with a red \* correspond to Pro. Assignments of some resonances of ET are indicated. Secondary structure of BRD3 ET is shown schematically in panels C and E.

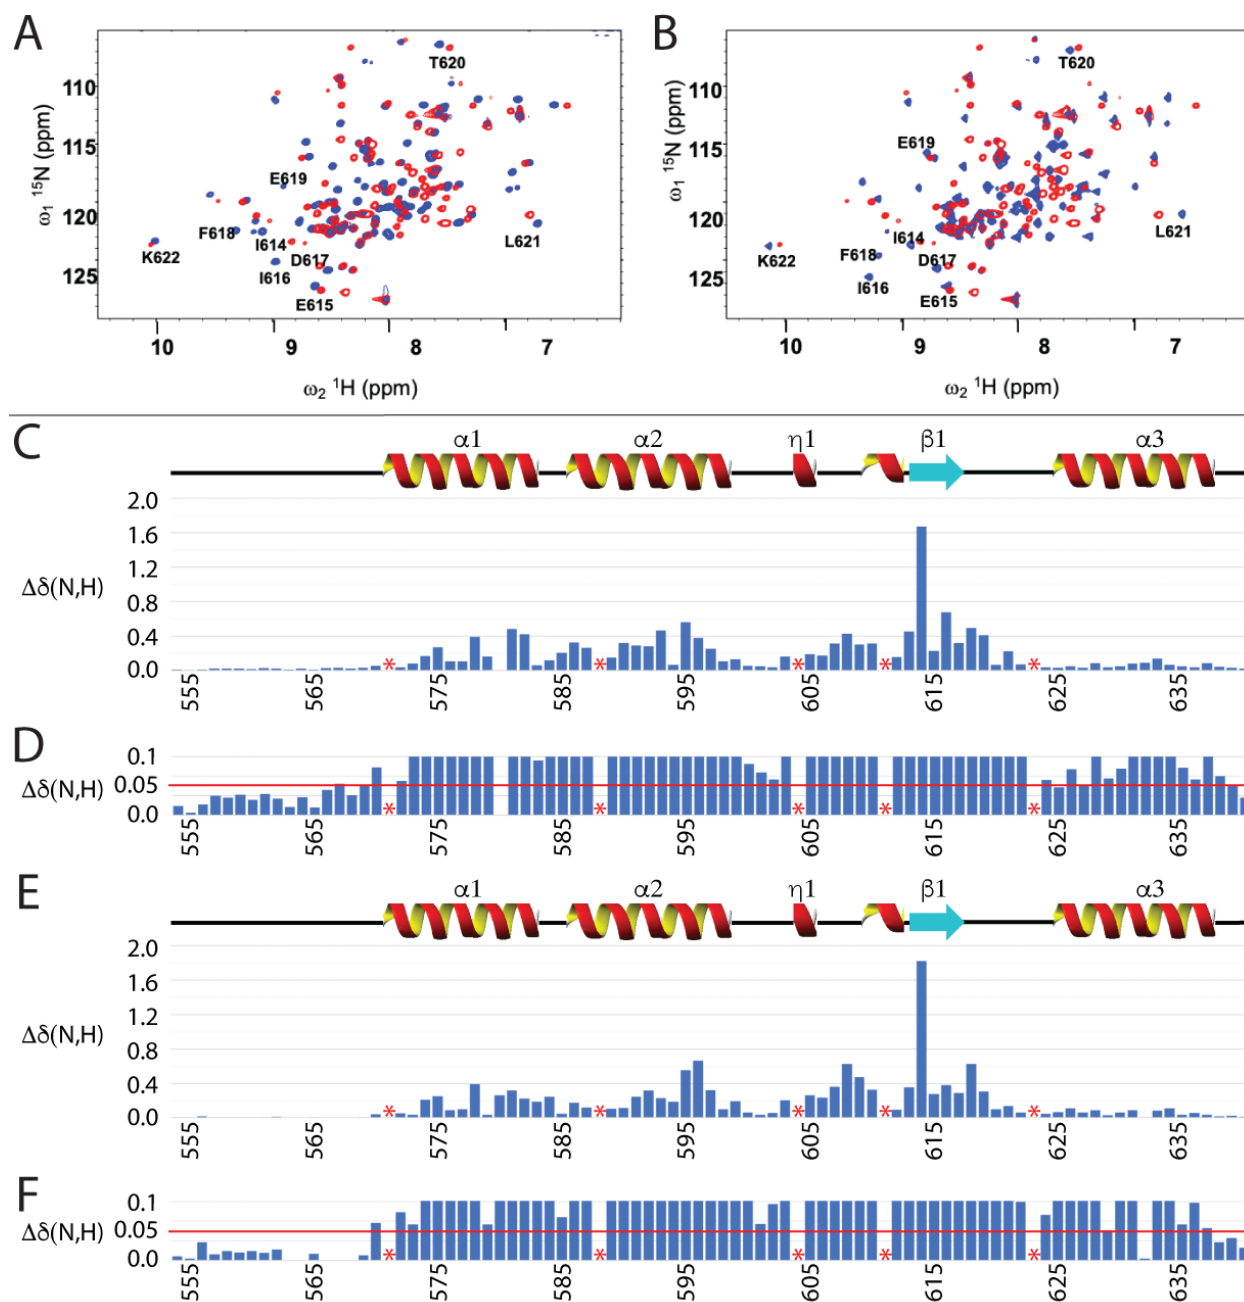

**Supplementary Fig. S5. Comparison of chemical shift perturbations of backbone amides, Related to Figures 2, 3, 4 and 5.** (A) Chemical shift perturbations of MLV IN CTD, in complex with BRD3 ET minus chemical shifts of apo MLV IN CTD. (B) Chemical shift perturbations of BRD3 ET, in complex with MLV IN CTD : BRD3 ET minus chemical shifts of MLV IN TP : BRD3 ET. Inset of the ribbon diagrams in color indicate the amide  $^{15}\text{N},^1\text{H}$  resonances being compared while the rest is shown in gray. Residue numbers of the IN CTD and BRD3 ET domain are indicated in each panel (bottom) along with the schematic of the domains (top). Residues indicated by a red \* correspond to Pro.

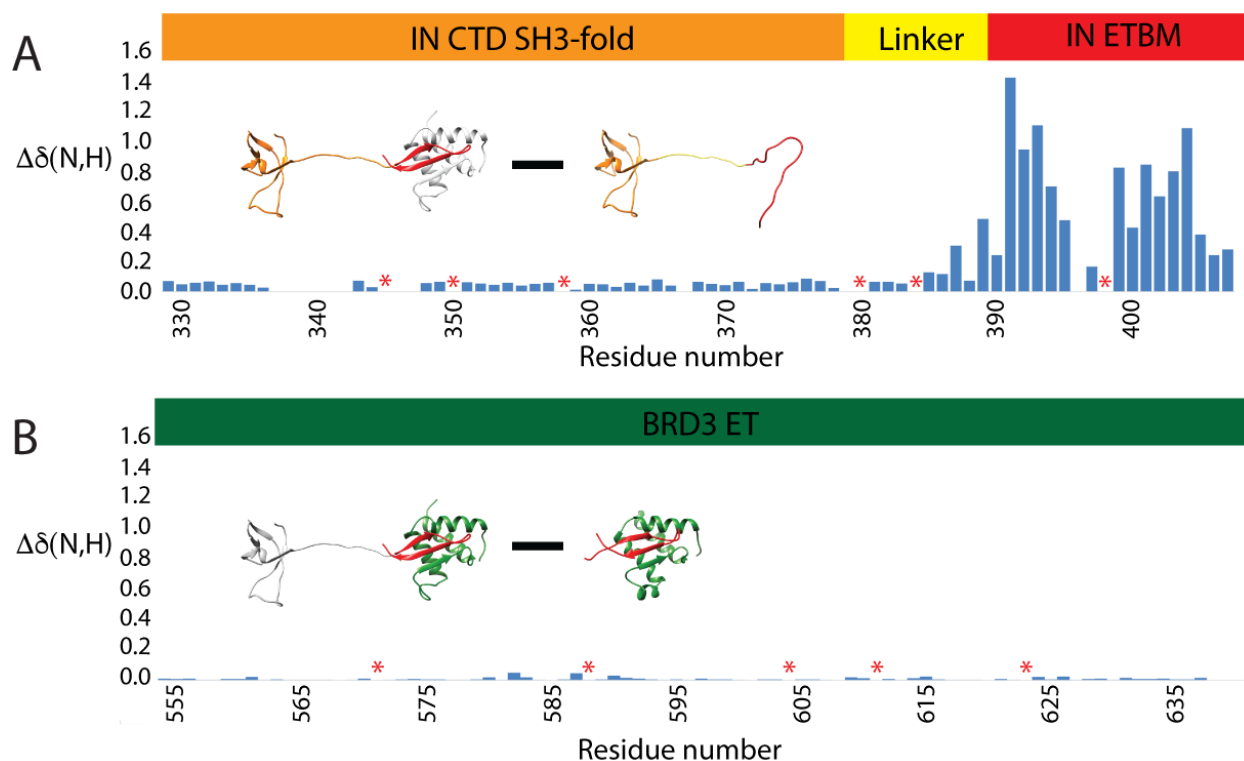

**Supplementary Fig. S6. Comparison of chemical shift perturbations of BRD3 ET induced by LANA and JMJD6, Related to Figures 2 and 3.** (A) Constructs of LANA and JMJD6. Chemical shift perturbations of BRD3 ET domain relative to the bound (B) LANA and (C) JMJD6 calculated using  $\Delta\delta(N,H) = ((\delta_N/6)^2 + (\delta_H)^2)^{0.5}$  and plotted as a function of BRD3 ET sequence. Amino-acid residue positions marked with a red \* correspond to Pro. The residues that were not assigned in the spectrum due to ambiguity of the assignment or missing cross peaks in the complex are included with  $\Delta\delta(N,H)=0$ . (D) and (E) are the perturbations mapped onto the 3D structure of BRD3 ET and IN TP (IN TP is not displayed for ease of visualization) indicating the major interactions of the peptides are in the region of  ${}_{613}\text{EIEID}_{617}$  in both the complexes in addition to those shown.

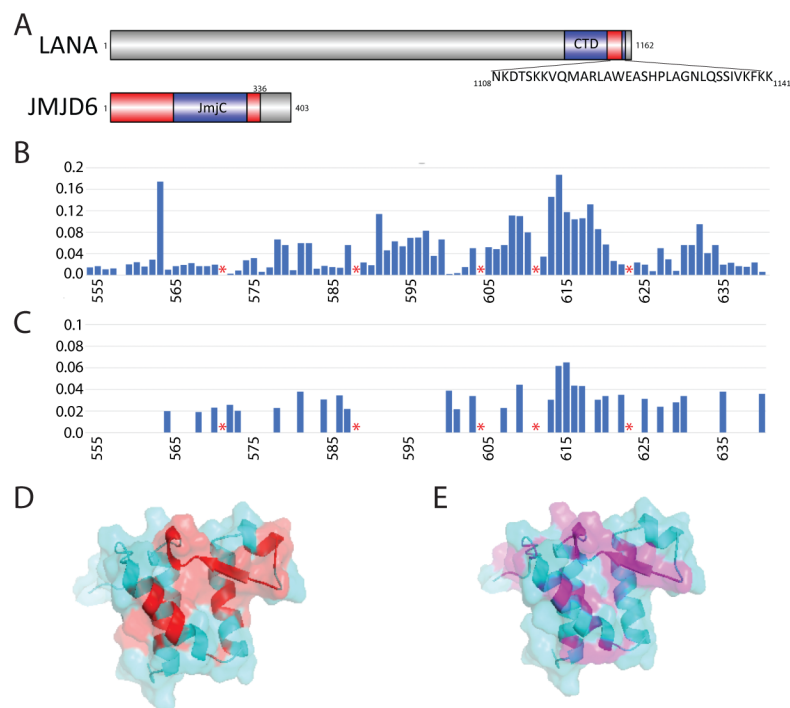

Supplement: NIHMS1665682-supplement-Supplemental_Material_Corrected.pdf [file NIHMS1665682-supplement-Supplemental_Material_Corrected.pdf]
